# Supplementary material
Source: PubMed Central journal article supplement (PMC8608700)
Supplement: NIHMS1731178-supplement-1.pdf [file NIHMS1731178-supplement-1.pdf]

**Appendix**  
**Gestational Diabetes and Overweight/Obesity: Analysis of Nulliparous Women in the U.S., 2011–2019**  
**Wang et al.**

**Appendix Table 1.** Maternal Characteristics by BMI Category in Nulliparous Women in the U.S., 2011–2019

| <b>Characteristic</b>                 | <b>Underweight<sup>a</sup></b> | <b>Normal weight<sup>a</sup></b> | <b>Overweight<sup>a</sup></b> | <b>Obese<sup>a</sup></b> |
|---------------------------------------|--------------------------------|----------------------------------|-------------------------------|--------------------------|
| N                                     | 539,634                        | 5,789,317                        | 2,993,289                     | 2,628,641                |
| Maternal age, mean (SD)               | 24.3 (5.7)                     | 26.3 (5.9)                       | 26.6 (5.8)                    | 26.5 (5.7)               |
| Race/Ethnicity, <i>n</i> (%)          |                                |                                  |                               |                          |
| Non-Hispanic White                    | 274,069 (50.8)                 | 3,475,075 (60.0)                 | 1,620,041 (54.1)              | 1,440,738 (54.8)         |
| Non-Hispanic Black                    | 74,139 (13.7)                  | 680,766 (11.8)                   | 430,961 (14.4)                | 497,323 (18.9)           |
| Hispanic                              | 103,128 (19.1)                 | 1,183,361 (20.4)                 | 674,395 (22.5)                | 559,343 (21.3)           |
| Non-Hispanic Asian                    | 88,298 (16.4)                  | 450,115 (7.8)                    | 267,892 (8.9)                 | 131,237 (5.0)            |
| Education, <i>n</i> (%)               |                                |                                  |                               |                          |
| Less than high school                 | 100,239 (18.7)                 | 687,515 (12.0)                   | 318,179 (10.7)                | 256,721 (9.8)            |
| High school graduate                  | 157,554 (29.4)                 | 1,274,184 (22.2)                 | 698,764 (23.5)                | 723,434 (27.7)           |
| Greater than high school              | 277,501 (51.8)                 | 3,789,420 (65.9)                 | 1,956,685 (65.8)              | 1,633,742 (62.5)         |
| Payment method, <i>n</i> (%)          |                                |                                  |                               |                          |
| Private insurance                     | 221,434 (41.4)                 | 3,217,060 (56.0)                 | 1,639,178 (55.2)              | 1,357,660 (52.0)         |
| Medicaid                              | 266,207 (49.8)                 | 2,059,477 (35.9)                 | 1,106,823 (37.3)              | 1,104,296 (42.3)         |
| Other/Self pay                        | 47,196 (8.8)                   | 465,841 (8.1)                    | 223,742 (7.5)                 | 147,216 (5.6)            |
| Received prenatal care, <i>n</i> (%)  | 517,477 (98.5)                 | 5,589,505 (98.8)                 | 2,893,684 (98.8)              | 2,543,363 (98.9)         |
| Smoked during pregnancy, <i>n</i> (%) | 51,011 (9.7)                   | 316,996 (5.6)                    | 164,381 (5.6)                 | 186,534 (7.3)            |

<sup>a</sup>Underweight (<18.5 kg/m<sup>2</sup>); Normal weight (18.5-24.9 kg/m<sup>2</sup> [18.5-22.9 kg/m<sup>2</sup> for Asian women]); Overweight (25.0-29.9 kg/m<sup>2</sup> [23.0-27.4 kg/m<sup>2</sup> for Asian women]); Obese (≥30.0 kg/m<sup>2</sup> [≥27.5 kg/m<sup>2</sup> for Asian women]).

**Appendix**  
**Gestational Diabetes and Overweight/Obesity: Analysis of Nulliparous Women in the U.S., 2011–2019**  
**Wang et al.**

**Appendix Table 2.** Age-Standardized Rates of Gestational Diabetes by Race/Ethnicity and BMI Category in Nulliparous Women

| Race/ethnicity     | 2011                                                | 2012  | 2013  | 2014  | 2015  | 2016  | 2017  | 2018  | 2019  |
|--------------------|-----------------------------------------------------|-------|-------|-------|-------|-------|-------|-------|-------|
|                    | Gestational diabetes mellitus per 1,000 live births |       |       |       |       |       |       |       |       |
| Non-Hispanic White |                                                     |       |       |       |       |       |       |       |       |
| Underweight        | 26.0                                                | 27.2  | 27.9  | 27.9  | 27.8  | 27.7  | 31.0  | 34.4  | 32.8  |
| Normal weight      | 25.6                                                | 26.4  | 26.2  | 27.2  | 28.5  | 28.5  | 31.2  | 32.8  | 33.3  |
| Overweight         | 46.9                                                | 48.8  | 48.5  | 47.9  | 49.8  | 49.6  | 52.6  | 54.3  | 55.0  |
| Obese              | 98.1                                                | 102.1 | 101.5 | 102.0 | 102.5 | 102.7 | 108.5 | 110.6 | 114.4 |
| Non-Hispanic Black |                                                     |       |       |       |       |       |       |       |       |
| Underweight        | 16.7                                                | 25.5  | 15.5  | 23.3  | 17.9  | 26.9  | 23.7  | 23.1  | 25.8  |
| Normal weight      | 25.3                                                | 28.5  | 29.2  | 28.2  | 29.0  | 29.2  | 29.9  | 28.5  | 30.4  |
| Overweight         | 48.4                                                | 48.2  | 46.1  | 47.4  | 46.3  | 47.6  | 48.7  | 47.5  | 48.5  |
| Obese              | 84.0                                                | 84.7  | 82.6  | 81.9  | 81.6  | 85.6  | 85.3  | 83.2  | 88.4  |
| Hispanic           |                                                     |       |       |       |       |       |       |       |       |
| Underweight        | 22.0                                                | 24.4  | 25.2  | 23.7  | 25.3  | 25.6  | 30.4  | 31.3  | 33.1  |
| Normal weight      | 30.4                                                | 31.8  | 30.6  | 31.9  | 31.5  | 33.5  | 37.3  | 38.6  | 37.5  |
| Overweight         | 53.6                                                | 55.4  | 58.1  | 58.7  | 58.0  | 60.8  | 61.7  | 62.7  | 63.6  |
| Obese              | 95.8                                                | 105.0 | 101.9 | 106.1 | 108.9 | 113.6 | 114.9 | 116.5 | 117.8 |
| Non-Hispanic Asian |                                                     |       |       |       |       |       |       |       |       |
| Underweight        | 42.9                                                | 45.1  | 45.9  | 49.1  | 51.9  | 51.1  | 55.3  | 61.5  | 65.2  |
| Normal weight      | 55.9                                                | 58.3  | 59.7  | 61.6  | 64.3  | 67.2  | 71.1  | 77.5  | 75.9  |
| Overweight         | 86.7                                                | 95.9  | 97.7  | 99.3  | 103.3 | 105.3 | 111.5 | 112.7 | 116.0 |
| Obese              | 130.3                                               | 147.2 | 139.5 | 147.3 | 152.3 | 155.5 | 162.9 | 166.3 | 169.7 |

**Appendix**  
**Gestational Diabetes and Overweight/Obesity: Analysis of Nulliparous Women in the U.S., 2011–2019**  
**Wang et al.**

**Appendix Table 3.** Population Attributable Fractions for Gestational Diabetes Associated With Prepregnancy Overweight and Obesity in Nulliparous Women

|                           | 2011                                                | 2012                 | 2013                 | 2014                 | 2015                 | 2016                 | 2017                 | 2018                 | 2019                 |
|---------------------------|-----------------------------------------------------|----------------------|----------------------|----------------------|----------------------|----------------------|----------------------|----------------------|----------------------|
| <b>Race/ethnicity</b>     | <b>Population attributable fraction, % (95% CI)</b> |                      |                      |                      |                      |                      |                      |                      |                      |
| <b>Non-Hispanic White</b> |                                                     |                      |                      |                      |                      |                      |                      |                      |                      |
| Normal weight             | ref                                                 | ref                  | ref                  | ref                  | ref                  | ref                  | ref                  | ref                  | ref                  |
| Overweight                | 10.8<br>(10.2, 11.4)                                | 10.9<br>(10.3, 11.5) | 10.7<br>(10.1, 11.3) | 10.0<br>(9.4, 10.5)  | 10.4<br>(9.8, 10.9)  | 10.2<br>(9.6, 10.7)  | 9.6<br>(9.1, 10.1)   | 9.3<br>(8.8, 9.8)    | 9.4<br>(8.9, 9.9)    |
| Obese                     | 30.9<br>(30.2, 31.6)                                | 31.1<br>(30.5, 31.8) | 31.4<br>(30.7, 32.1) | 31.3<br>(30.7, 32.0) | 31.2<br>(30.6, 31.8) | 32.1<br>(31.5, 32.7) | 32.0<br>(31.4, 32.7) | 32.2<br>(31.6, 32.8) | 33.3<br>(32.7, 33.9) |
| Overweight or obese       | 41.6<br>(40.6, 42.6)                                | 42.0<br>(41.0, 42.9) | 42.0<br>(41.1, 43.0) | 41.2<br>(40.4, 42.1) | 41.5<br>(40.6, 42.3) | 42.2<br>(41.3, 43.1) | 41.6<br>(40.7, 42.4) | 41.5<br>(40.6, 42.3) | 42.6<br>(41.7, 43.4) |
| <b>Non-Hispanic Black</b> |                                                     |                      |                      |                      |                      |                      |                      |                      |                      |
| Normal weight             | ref                                                 | ref                  | ref                  | ref                  | ref                  | ref                  | ref                  | ref                  | ref                  |
| Overweight                | 12.3<br>(10.7, 13.8)                                | 9.6<br>(8.1, 11.1)   | 9.3<br>(7.8, 10.7)   | 10.4<br>(9.0, 11.7)  | 9.9<br>(8.6, 11.2)   | 9.6<br>(8.3, 10.8)   | 10.1<br>(8.8, 11.3)  | 10.3<br>(9.1, 11.6)  | 9.2<br>(8.0, 10.4)   |
| Obese                     | 36.3<br>(34.4, 38.2)                                | 33.7<br>(31.8, 35.5) | 34.0<br>(32.1, 35.8) | 34.3<br>(32.5, 35.9) | 34.9<br>(33.2, 36.6) | 36.0<br>(34.3, 37.6) | 35.6<br>(33.9, 37.2) | 37.2<br>(35.5, 38.8) | 37.9<br>(36.2, 39.5) |
| Overweight or obese       | 48.5<br>(45.8, 51.1)                                | 43.2<br>(40.5, 45.8) | 43.2<br>(40.5, 45.7) | 44.5<br>(42.1, 46.9) | 44.7<br>(42.3, 47.1) | 45.5<br>(43.1, 47.7) | 45.6<br>(43.2, 47.9) | 47.5<br>(45.1, 49.7) | 47.0<br>(44.7, 49.2) |
| <b>Hispanic</b>           |                                                     |                      |                      |                      |                      |                      |                      |                      |                      |
| Normal weight             | ref                                                 | ref                  | ref                  | ref                  | ref                  | ref                  | ref                  | ref                  | ref                  |
| Overweight                | 12.0<br>(10.8, 13.2)                                | 11.3<br>(10.2, 12.5) | 12.5<br>(11.4, 13.7) | 12.2<br>(11.2, 13.3) | 12.8<br>(11.7, 13.8) | 12.2<br>(11.2, 13.2) | 11.1<br>(10.1, 12.1) | 10.9<br>(9.9, 11.8)  | 11.3<br>(10.4, 12.3) |
| Obese                     | 27.2<br>(26.0, 28.5)                                | 29.1<br>(27.9, 30.3) | 29.2<br>(28.0, 30.4) | 30.1<br>(29.0, 31.2) | 31.4<br>(30.3, 32.4) | 31.8<br>(30.8, 32.9) | 30.8<br>(29.7, 31.8) | 31.6<br>(30.5, 32.6) | 33.3<br>(32.3, 34.3) |
| Overweight or obese       | 39.2<br>(37.4, 41.0)                                | 40.4<br>(38.6, 42.1) | 41.7<br>(39.9, 43.4) | 42.3<br>(40.7, 43.9) | 44.1<br>(42.5, 45.6) | 44.0<br>(42.5, 45.5) | 41.8<br>(40.3, 43.4) | 42.4<br>(40.9, 44.0) | 44.6<br>(43.1, 46.1) |
| <b>Non-Hispanic Asian</b> |                                                     |                      |                      |                      |                      |                      |                      |                      |                      |
| Normal weight             | ref                                                 | ref                  | ref                  | ref                  | ref                  | ref                  | ref                  | ref                  | ref                  |
| Overweight                | 12.1<br>(10.5, 13.6)                                | 13.3<br>(11.9, 14.7) | 12.9<br>(11.5, 14.3) | 13.0<br>(11.7, 14.3) | 13.0<br>(11.8, 14.3) | 12.5<br>(11.3, 13.6) | 12.9<br>(11.7, 14.0) | 11.4<br>(10.3, 12.6) | 11.6<br>(10.4, 12.7) |
| Obese                     | 12.2<br>(11.2, 13.3)                                | 13.1<br>(12.1, 14.0) | 12.3<br>(11.3, 13.3) | 13.2<br>(12.3, 14.1) | 14.0<br>(13.1, 14.9) | 13.8<br>(12.9, 14.6) | 14.6<br>(13.7, 15.4) | 14.6<br>(13.7, 15.5) | 15.4<br>(14.5, 16.3) |
| Overweight or obese       | 24.3<br>(22.3, 26.2)                                | 26.4<br>(24.6, 28.1) | 25.2<br>(23.4, 27.0) | 26.2<br>(24.5, 27.8) | 27.0<br>(25.4, 28.6) | 26.2<br>(24.6, 27.7) | 27.5<br>(25.9, 29.0) | 26.0<br>(24.4, 27.6) | 26.9<br>(25.3, 28.5) |

**Appendix**  
**Gestational Diabetes and Overweight/Obesity: Analysis of Nulliparous Women in the U.S., 2011–2019**  
**Wang et al.**

**Appendix Table 4.** Population Attributable Fractions for Gestational Diabetes Associated With Prepregnancy Overweight and Obesity in Racial/Ethnic Subgroups

| Race/ethnicity                   | 2011                                         | 2015              | 2019              | <i>p</i> -value for difference <sup>a</sup><br>2011 vs 2019 |
|----------------------------------|----------------------------------------------|-------------------|-------------------|-------------------------------------------------------------|
|                                  | Population attributable fraction, % (95% CI) |                   |                   |                                                             |
| <b>Mexican</b>                   |                                              |                   |                   |                                                             |
| Normal weight                    | ref                                          | ref               | ref               | ref                                                         |
| Overweight                       | 11.5 (9.9, 13.0)                             | 13.1 (11.7, 14.4) | 12.0 (10.7, 14.4) | 0.32                                                        |
| Obese                            | 28.4 (26.8, 30.0)                            | 33.9 (32.5, 35.4) | 35.9 (34.4, 35.4) | <b>&lt;0.001</b>                                            |
| Overweight or obese              | 39.9 (37.4, 42.2)                            | 47.0 (44.8, 49.0) | 47.8 (45.7, 49.0) | <b>&lt;0.001</b>                                            |
| <b>Puerto Rican</b>              |                                              |                   |                   |                                                             |
| Normal weight                    | ref                                          | ref               | ref               | ref                                                         |
| Overweight                       | 9.1 (5.1, 12.9)                              | 15.3 (11.8, 18.6) | 10.9 (8.1, 18.6)  | 0.23                                                        |
| Obese                            | 32.7 (28.1, 37.1)                            | 38.7 (34.6, 42.6) | 39.6 (36.0, 42.6) | <b>0.008</b>                                                |
| Overweight or obese              | 41.7 (35.0, 47.8)                            | 53.9 (48.2, 59.1) | 50.4 (45.3, 59.1) | <b>0.02</b>                                                 |
| <b>Central or South American</b> |                                              |                   |                   |                                                             |
| Normal weight                    | ref                                          | ref               | ref               | ref                                                         |
| Overweight                       | 12.2 (8.6, 15.7)                             | 12.7 (9.8, 15.6)  | 11.8 (9.2, 15.6)  | 0.42                                                        |
| Obese                            | 17.8 (14.8, 20.7)                            | 20.9 (18.4, 23.4) | 23.8 (21.5, 23.4) | <b>&lt;0.001</b>                                            |
| Overweight or obese              | 30.1 (25.1, 34.7)                            | 33.6 (29.5, 37.5) | 35.6 (31.8, 37.5) | <b>0.04</b>                                                 |
| <b>Asian Indian<sup>b</sup></b>  |                                              |                   |                   |                                                             |
| Normal weight                    | ref                                          | ref               | ref               | ref                                                         |
| Overweight                       | 14.3 (11.0, 17.4)                            | 16.5 (14.0, 19.0) | 15.1 (12.9, 19.0) | 0.33                                                        |
| Obese                            | 13.1 (11.0, 15.1)                            | 14.9 (13.2, 16.5) | 17.7 (16.1, 16.5) | <b>&lt;0.001</b>                                            |
| Overweight or obese              | 27.4 (23.1, 31.4)                            | 31.4 (28.0, 34.5) | 32.8 (29.6, 34.5) | <b>0.02</b>                                                 |
| <b>Chinese<sup>b</sup></b>       |                                              |                   |                   |                                                             |
| Normal weight                    | ref                                          | ref               | ref               | ref                                                         |
| Overweight                       | 8.5 (5.6, 11.4)                              | 6.4 (4.1, 8.7)    | 7.0 (4.9, 8.7)    | 0.21                                                        |
| Obese                            | 4.0 (2.6, 5.5)                               | 5.2 (3.9, 6.4)    | 5.7 (4.5, 6.4)    | <b>0.04</b>                                                 |
| Overweight or obese              | 12.6 (9.2, 15.9)                             | 11.6 (8.9, 14.3)  | 12.8 (10.1, 14.3) | 0.47                                                        |
| <b>Filipina<sup>b</sup></b>      |                                              |                   |                   |                                                             |
| Normal weight                    | ref                                          | ref               | ref               | ref                                                         |
| Overweight                       | 14.3 (9.7, 18.6)                             | 12.4 (8.6, 16.1)  | 11.1 (7.2, 16.1)  | 0.15                                                        |
| Obese                            | 17.8 (14.5, 21.1)                            | 19.9 (16.8, 22.9) | 19.4 (16.3, 22.9) | 0.25                                                        |
| Overweight or obese              | 32.1 (26.0, 37.8)                            | 32.3 (26.7, 37.4) | 30.6 (24.7, 37.4) | 0.35                                                        |

<sup>a</sup>Boldface indicates statistical significance (*p*<0.05).

<sup>b</sup>Non-Hispanic women were included.

**Appendix Figure 1.** Flow diagram for the final analytic sample representing the study population.

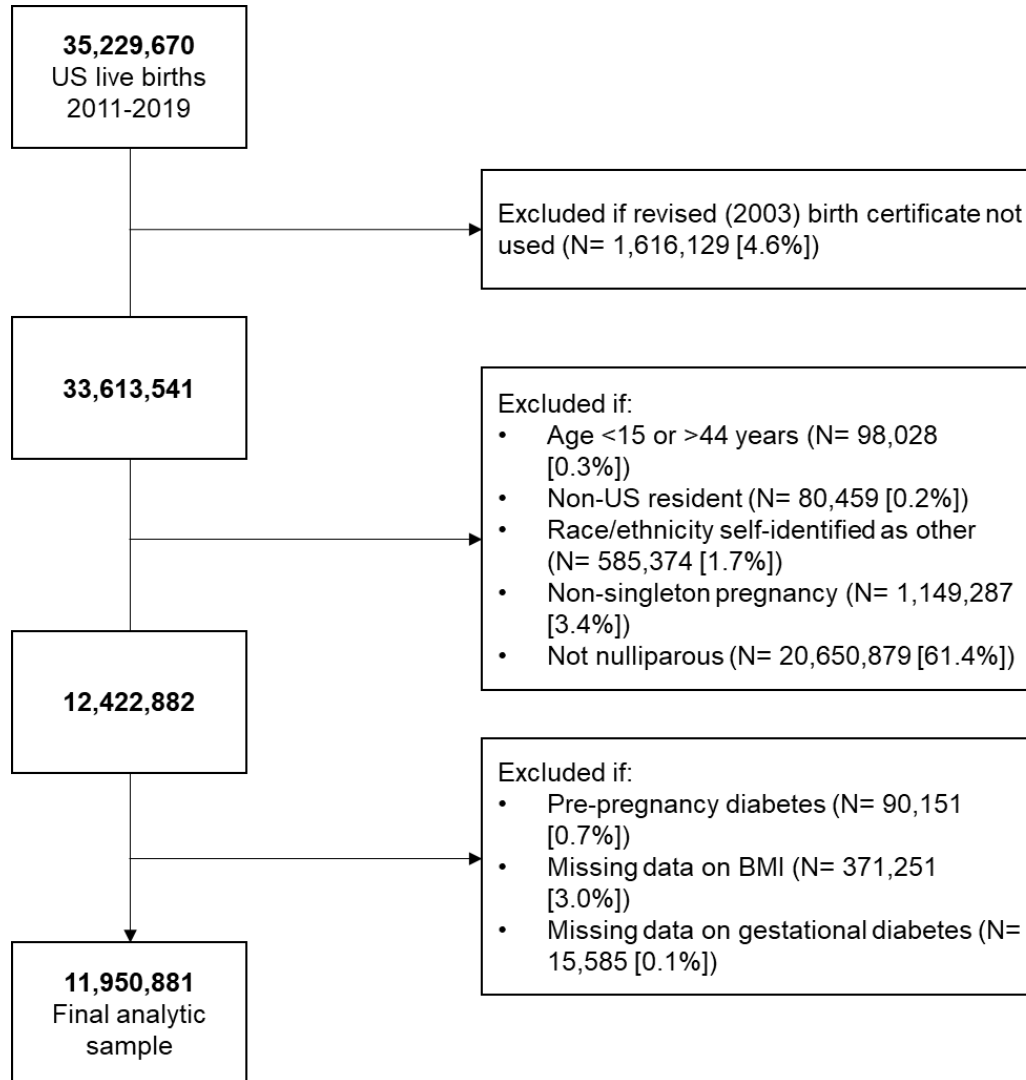

*Notes:* From the initial population of all live births in the U.S. between 2011–2019 (N=35,229,670), we first excluded records that did not use the revised (2003) birth certificate. We then applied the following inclusion criteria: maternal age 15–44 years; U.S. resident; self-identified as non-Hispanic White, non-Hispanic Black, Hispanic, or non-Hispanic Asian; singleton pregnancy; and nulliparous. Finally, we applied the following exclusion criteria: pre-pregnancy diabetes, or missing data on prepregnancy BMI or gestational diabetes. Our final analytic sample contained 11,950,881 live births.
